# Supplementary material for: Adipocyte P2Y14 receptors play a key role in regulating whole-body glucose and lipid homeostasis
Source: PubMed Central journal article supplement (PMC8262345; doi:10.1172/jci.insight.146577), 2021-05-24
Supplement: jciinsight-6-146577-s207.pdf [file jciinsight-6-146577-s207.pdf]

Supplemental Information for

## Adipocyte P2Y<sub>14</sub> receptors play a key role in regulating whole-body glucose and lipid homeostasis

Shanu Jain, Sai P. Pydi, Young-Hwan Jung, Mirko Scortichini, Efrat L. Kesner, Tadeusz P. Karcz, Donald N. Cook, Oksana Gavrilova, Jürgen Wess, Kenneth A. Jacobson

corresponding authors: Shanu Jain, Kenneth A. Jacobson

Email: shanu.jain@nih.gov, kennethj@niddk.nih.gov

### **This PDF file includes:**

Figures S1 to S7

Tables S1 to S2

## Supplementary Figures

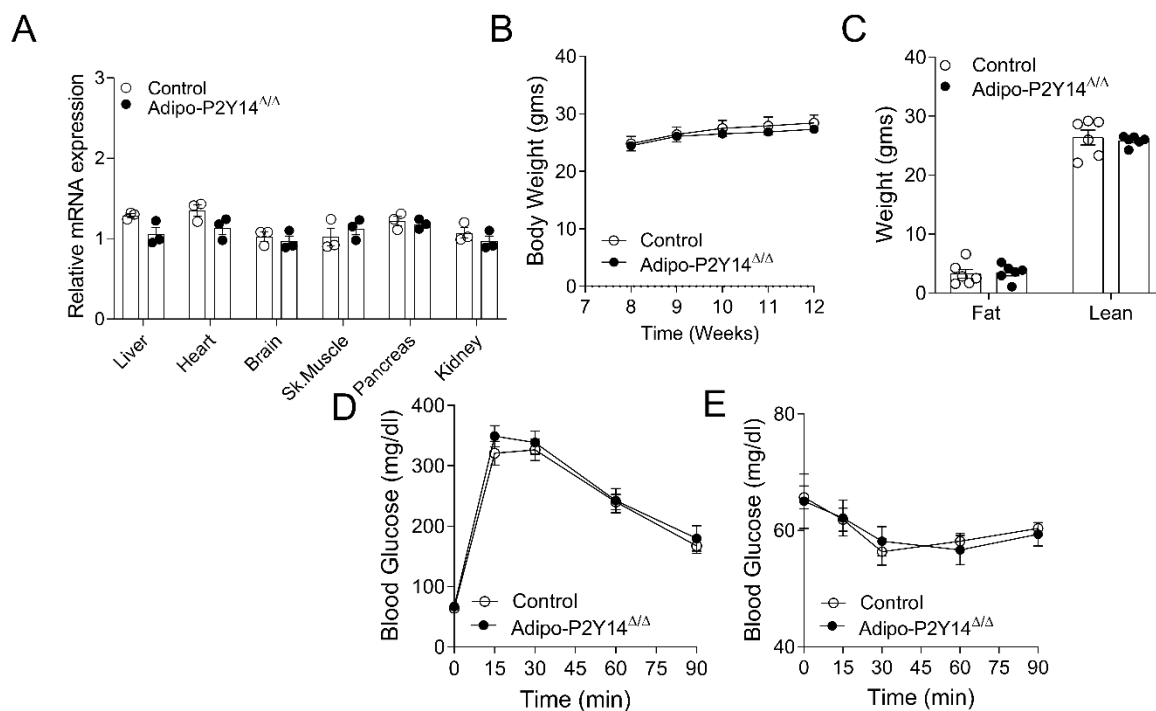

**Figure S1: Metabolic analysis of adipo-P2Y14<sup>Δ/Δ</sup> and control mice maintained on chow diet (RC).**

- (A) mRNA levels of P2Y<sub>14</sub>R in liver, heart, brain, skeletal muscle, pancreas, and kidney of adipo-P2Y14<sup>Δ/Δ</sup> and control mice on RC (n=3/group).  
 (B) Body weight measurements on RC (n=6-8/group).  
 (C) Body composition of mice maintained on RC (n=6/group).  
 (D) Glucose tolerance test (IGTT, 2 g/kg glucose i.p.) (n=12-14/group).  
 (E) Insulin tolerance test (ITT, 0.75 U/kg insulin i.p.) (n=6/group).

All data are expressed as means ± SEM. (A, C: two-tailed Student's t-test; B, D-E: two-way ANOVA followed by Bonferroni's post hoc test).

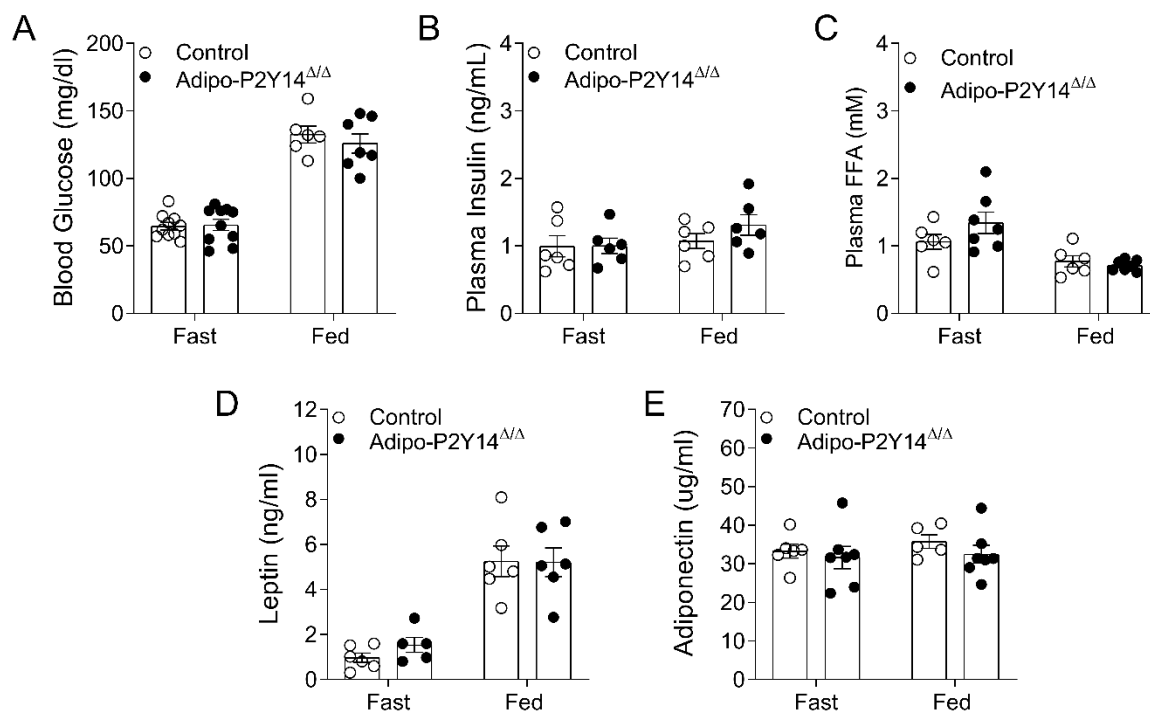

**Figure S2: Plasma profiling of adipo-P2Y14<sup>Δ/Δ</sup> and control mice maintained on chow diet (RC).**

- (A) Fasting and fed blood glucose levels (n=6-10/group).
- (B) Fasting and fed plasma insulin levels (n=6/group).
- (C) Fasting and fed plasma free fatty acid (FFA) levels (n=6 or 7/group).
- (D) Fasting and fed plasma leptin levels (n=5 or 6/group).
- (E) Fasting and fed plasma adiponectin levels (n=5-7/group).

All data are expressed as means  $\pm$  SEM. (two-tailed Student's t-test).

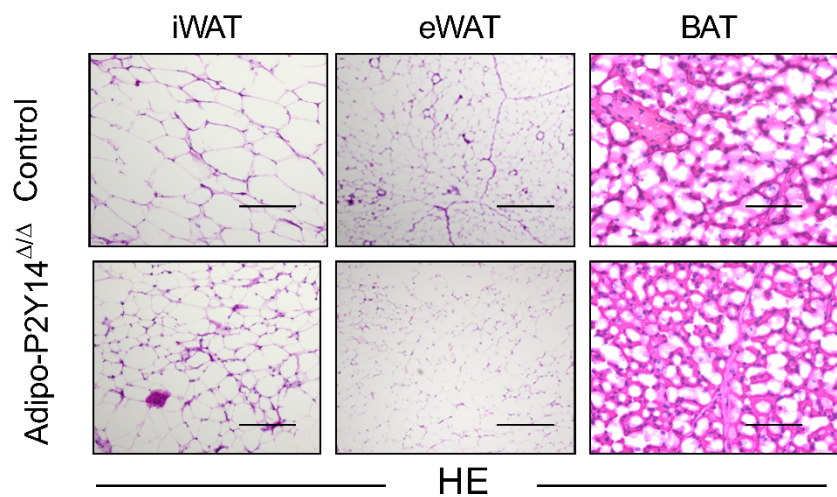

**Figure S3: Reduced adipocyte size in WAT of adipo-P2Y14<sup>Δ/Δ</sup> mice on HFD.**

Representative H&E stained sections of iWAT, eWAT and BAT from HFD adipo-P2Y14<sup>Δ/Δ</sup> and control mice. All experiments were conducted on mice fed on HFD for at least 8 weeks.

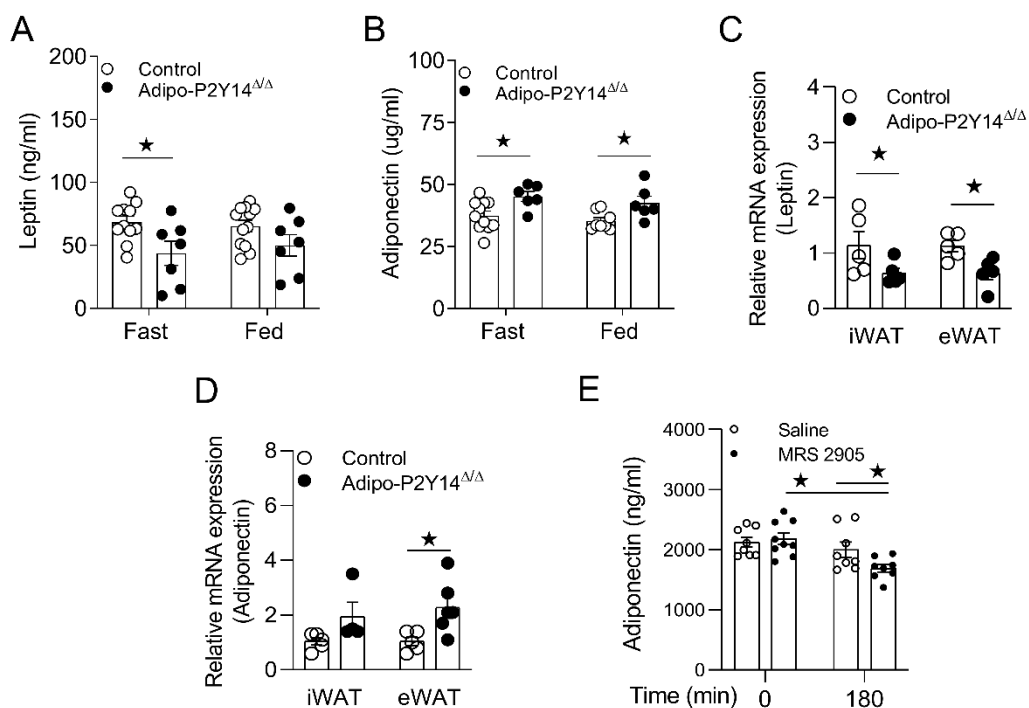

**Figure S4: Leptin and adiponectin levels adipo-P2Y14 $\Delta/\Delta$  mice on HFD.**

- (A) Fasting and fed plasma leptin levels (n=7-11/group).  
 (B) Fasting and fed plasma adiponectin levels (n=6-12/group).  
 (C) mRNA expression levels of leptin in iWAT and eWAT of HFD adipo-P2Y14 $\Delta/\Delta$  and control mice (n=4-6/group).  
 (D) mRNA expression levels of adiponectin in iWAT and eWAT of HFD adipo-P2Y14 $\Delta/\Delta$  and control mice (n=4-6/group).  
 (E) Plasma adiponectin levels in HFD WT mice i.p. injected with saline or MRS2905 (10 mg/kg, i.p.). Blood was collected immediately before and 180 min after injections (n=8 or 9/group).

All data are expressed as means  $\pm$  SEM. \* $p < 0.05$  (A-D: two-tailed Student's t-test; E: One-way ANOVA followed by Bonferroni's post hoc test). All experiments were conducted on mice fed on HFD for at least 8 weeks.

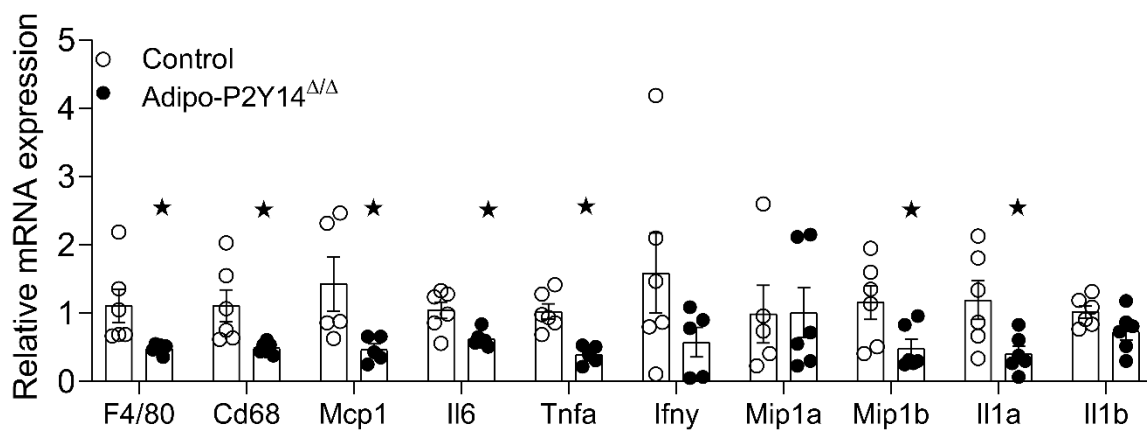

**Figure S5: Reduced inflammation in BAT of adipo-P2Y14 $\Delta/\Delta$  mice on HFD.**

Relative mRNA expression levels of inflammatory genes in BAT from HFD adipo-P2Y14 $\Delta/\Delta$  and control mice (n=5-6/group).

The expression of 18sRNA was used to normalize qRT-PCR data. All data are expressed as means  $\pm$  SEM. \*p < 0.05 (two-tailed Student's t-test). All experiments were conducted on mice fed on HFD for at least 8 weeks.

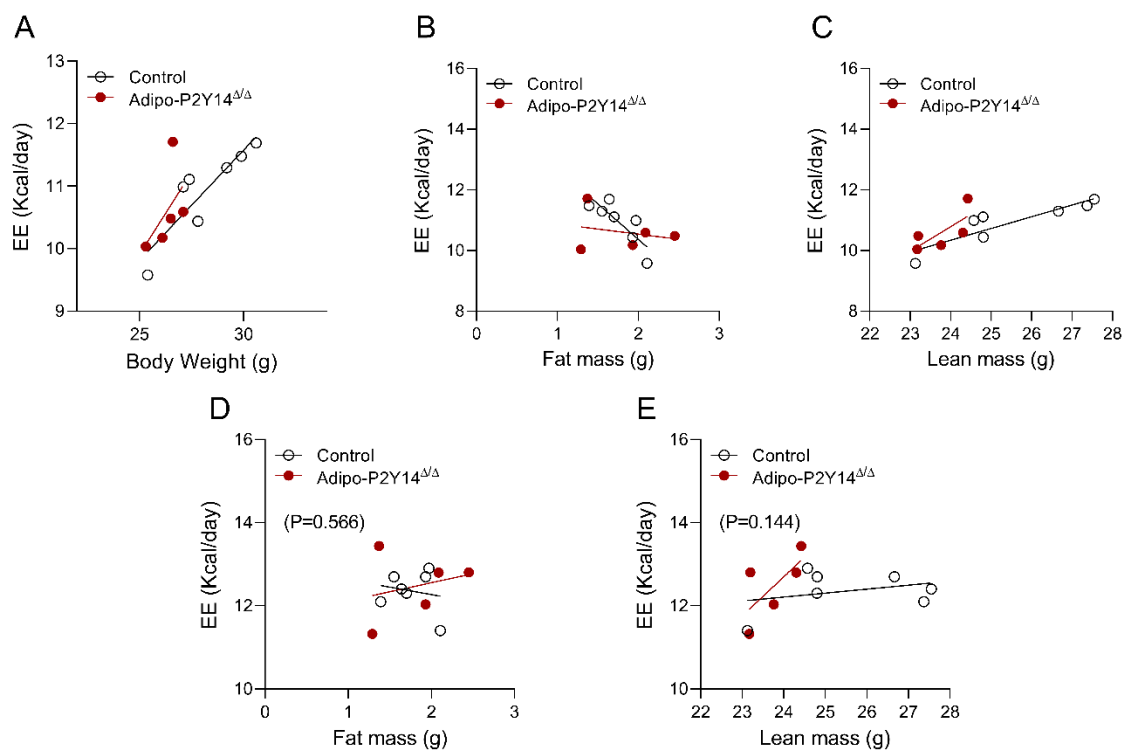

**Figure S6: Energy expenditure in RC and HFD adipo-P2Y14 $\Delta/\Delta$  mice.**

- (A) Energy expenditure normalized to body weight on RC.
- (B) Energy expenditure normalized to fat mass on RC.
- (C) Energy expenditure normalized to lean mass on RC.
- (D) Energy expenditure normalized to fat mass on HFD.
- (E) Energy expenditure normalized to lean mass on HFD.

For all panels, n=5-7/group. Data were analyzed using ANCOVA.

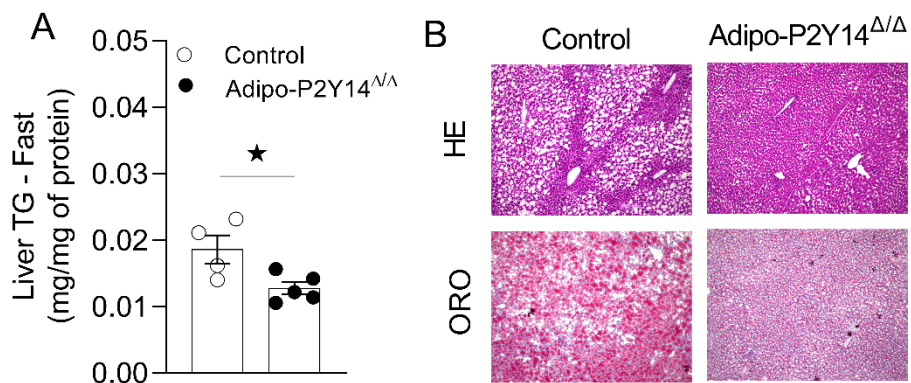

**Figure S7: Reduced liver steatosis in fasted HFD adipo-P2Y14<sup>Δ/Δ</sup> mice.**

(A) Liver triglyceride levels in fasted control and adipo-P2Y14<sup>Δ/Δ</sup> mice. (n=4-5/group).

(B) ORO and HE stain in liver sections from fasted control and adipo-P2Y14<sup>Δ/Δ</sup> mice.

All data are expressed as means  $\pm$  SEM. \*p < 0.05 (two-tailed Student's t-test). All experiments were conducted on mice fed on HFD for at least 8 weeks.



**Table S1: List of primers used for RT-PCR studies.**

| Gene name            | Forward (5'-3')           | Reverse (5'-3')         |
|----------------------|---------------------------|-------------------------|
| <i>P2ry14</i>        | AGCAGATCATTCCCGTGTGT      | AGCCACCACTATGTTCTTGAGA  |
| <i>18S rRNA</i>      | CGGCTACCACATCCAAGGAA      | GCTGGAATTACCGCGGCT      |
| <i>Leptin</i>        | CAAGCAGTGCCTATCCAGA       | AAGCCCAGGAATGAAGTCCA    |
| <i>Adiponectin</i>   | GCACTGGCAAGTTCTACTGCAA    | GTAGGTGAAGAGAACGGCCTTGT |
| <i>F4/80</i>         | TCCTGCTGTGTCGTGCTGTTC     | GCCGTCTGGTTGTCAGTCTTGTC |
| <i>Cd68</i>          | TGTCTGATCTTGCTAGGACCG     | GAGAGTAACGGCCTTTTTGTGA  |
| <i>Mcp1</i>          | GCTCAGCCAGATGCAGTTAA      | TCTTGAGCTTGGTGACAAAACT  |
| <i>Il6</i>           | TAGTCCTTCCCTACCCCAATTTCC  | TTGGTCCTTAGCCACTCCTTC   |
| <i>Tnfa</i>          | CCCTCACACTCAGATCATCTTCT   | GCTACGACGTGGGCTACAG     |
| <i>Ifng</i>          | CGGCACAGTCATTGAAAGCCTA    | GTTGCTGATGGCCTGATTGTC   |
| <i>Mip1a</i>         | TGAGAGTCTTGGAGGCAGCGA     | TGTGGGTACTTGGCAGCAAACA  |
| <i>Mip1b</i>         | AACAACATGAAGCTCTGCGT      | AGAAACAGCAGGAAGTGGGA    |
| <i>IL1a</i>          | ACGTCAAGCAACGGGAAGAT      | AAGGTGCTGATCTGGGTTGG    |
| <i>IL1b</i>          | CTCCACCTCAATGGACAGAA      | GCCGTCTTTCATTACACAGG    |
| <i>Srebp1</i>        | AGTGGCAAAGGAGGCACTAC      | CACCCTCTGGAAGACCACA     |
| <i>Fas</i>           | GGAGGTGGTGATAGCCGGTAT     | TGGGTAATCCATAGAGCCCAG   |
| <i>Fgf21</i>         | CTGCTGGGGTCTACCAAG        | CTGCGCTACCACTGTTCC      |
| <i>G6pc</i>          | CGACTCGCTATCTCCAAGTGA     | GTTGAACCAGTCTCCGACCA    |
| <i>Pdk4</i>          | CCGCTTAGTGAACACTCCTTC     | TGACCAGCGTGTCTACAAACT   |
| <i>Pck1</i>          | CTGCATAACGGTCTGGACTTC     | CAGCAACTGCCCCTACTCC     |
| <i>Serca1</i>        | TGTTTGTCTATTTCTGGGGTG     | AATCCGCACAAGCAGGTCTTC   |
| <i>Serca2</i>        | GAGAACGCTCACACAAAGACC     | CAATTCGTTGGAGCCCCAT     |
| <i>Universal-Cre</i> | ACCTGAAGATGTTCTCGGATTATCT | ACCGTCAGTACGTGAGATATCTT |
|                      |                           |                         |

**Table S2: List of antibodies used for Western blot studies.**

| Antibodies             | Source <sup>a</sup> | Catalog # |
|------------------------|---------------------|-----------|
| T-HSL                  | Cell Signaling      | 4107      |
| p-HSL (Ser563)         | Cell Signaling      | 4139      |
| T-ATGL                 | Abcam               | 2138      |
| p-ATGL (Ser406)        | Abcam               | ab135093  |
| T-AKT                  | Cell Signaling      | 9272      |
| p-AKT (Thr308)         | Cell Signaling      | 2965      |
| p-AKT (Ser473)         | Cell Signaling      | 4060      |
| T-GSK-3 $\beta$        | Cell Signaling      | 5676      |
| p-GSK-3 $\beta$ (Ser9) | Cell Signaling      | 9336      |
| $\beta$ -Actin         | Cell Signaling      | 4970      |

<sup>a</sup> Cell Signaling Technology, Danvers, MA, USA, <https://www.cellsignal.com/>;  
Abcam, Cambridge, MA, USA, <https://www.abcam.com/>.
